# Supplementary material
Source: ML conference proceedings conference paper supplement (https://openreview.net/forum?id=ELQ8X02IEp)
Supplement: supplementary_material [file attachment]

# SUPPLEMENTARY MATERIAL: LEARNING RELIABLE RULES BY RE-GENERATING DEEP FEATURES

**Anonymous authors**

Paper under double-blind review

## 1 MORE CASE STUDIES OF MSFs

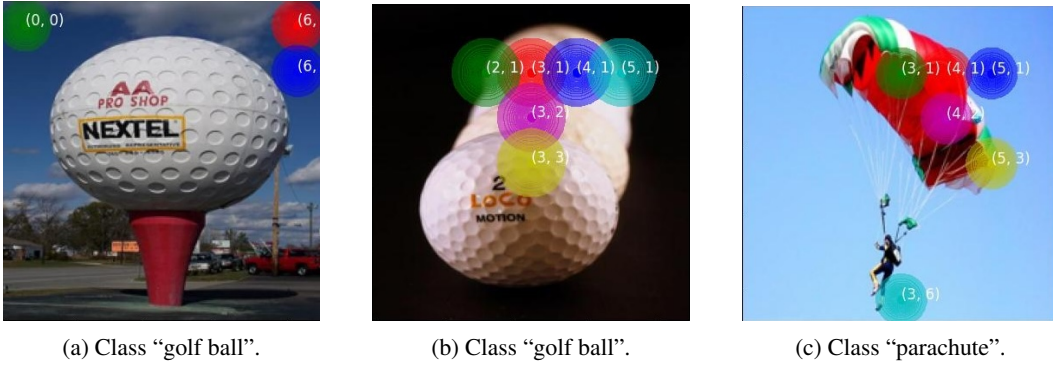

Figure 1: **(a)** The MSF of target feature (in red) includes non-neighboring features; **(b)** See analysis of rules in Table 1; **(c)** See analysis of rules in Table 2.
